# Supplementary material for: Are Traditional Performance Reviews Outdated? An Empirical Analysis on Continuous, Real-Time Feedback in the Workplace
Source: Atypon-hosted journal article supplement (doi:10.1287/isre.2020.0979), 2021-01-28
Supplement: isre.2020.0979.sm1.pdf [file isre.2020.0979.sm1.pdf]

# Are Traditional Performance Reviews Outdated? An Empirical Analysis on Continuous, Real-Time Feedback in the Workplace

## Online Appendix A

**Table A.1 Selective Review of Performance Feedback Studies and Positioning of the Current Study**

| <b>Study</b>                            | <b>Methodology</b>                                                                          | <b>Units of Analysis</b>               | <b>Independent variables</b>                                          | <b>Dependent variables</b>               | <b>Moderating variables</b>                                      | <b>Feedback application-based?</b> | <b>Feedback real-time?</b> |
|-----------------------------------------|---------------------------------------------------------------------------------------------|----------------------------------------|-----------------------------------------------------------------------|------------------------------------------|------------------------------------------------------------------|------------------------------------|----------------------------|
| <b>Current Study</b>                    | Observational study in several organizational settings using real-time feedback application | Actual feedback instances              | Anonymity, relationship                                               | Rating score (0-5)                       | Previous scores received and given, tit-for-tat strategy, gender | Yes                                | Yes                        |
| <b>Belschak &amp; Den Hartog (2009)</b> | Scenario studies of public or private feedback; subsequent survey                           | Individual survey responses            | Positive or negative valence                                          | Work attitudes and behavioral intentions | Emotional reaction to feedback                                   | No                                 | No                         |
| <b>Britt et al. (2016)</b>              | Survey of employed persons                                                                  | Individual survey responses            | Gender, training                                                      | Feedback behaviors                       | Training impacted giving but not receiving feedback              | No                                 | No                         |
| <b>Cooper (2006)</b>                    | Observational study in paper mill                                                           | Supervisors' daily safety observations | Observation frequency, goal-setting, feedback meetings, feedback data | Safety performance                       | Visible ongoing support                                          | No                                 | No                         |

|                                |                                                                                  |                            |                                                                |                                                  |                                               |     |     |
|--------------------------------|----------------------------------------------------------------------------------|----------------------------|----------------------------------------------------------------|--------------------------------------------------|-----------------------------------------------|-----|-----|
| <b>Festing et al. (2014)</b>   | Survey of top management in five countries                                       | Individual survey response | Gender                                                         | Satisfaction with performance management systems | None                                          | N/A | N/A |
| <b>Hekman et al. (2017)</b>    | Field and lab test of 350 executives rated by peers and bosses                   | Actual feedback instances  | Gender, race                                                   | Performance rating score                         | Leader competence, diversity-valuing behavior | No  | Yes |
| <b>Hsia et al. (2016)</b>      | Online peer feedback system and interviews with 100 dance students               | Actual feedback instances  | Peer ratings vs peer ratings plus feedback                     | Peer and group dance performance improvement     | Intrinsic motivation, self-efficacy           | No  | No  |
| <b>Huang et al. (2019)</b>     | Online performance feedback interactions to motivate user-generated content      | Actual feedback instances  | Message framing (competitive, cooperative, or individualistic) | Motivation                                       | Gender                                        | Yes | No  |
| <b>Ilies et al. (2007)</b>     | Survey and lab test of 197 undergraduates completing task and receiving feedback | Individual survey response | Performance feedback valence (positive vs negative)            | Individual affect response                       | Self-esteem                                   | No  | Yes |
| <b>Jung &amp; Sosik (2003)</b> | 31 student work groups performed decision-making tasks over 15 weeks             | Performance accuracy       | Individual and group performance feedback                      | Subsequent performance improvement               | Group potency, collective efficacy            | No  | No  |

|                                        |                                                                            |                            |                                                                           |                                               |                                                         |     |    |
|----------------------------------------|----------------------------------------------------------------------------|----------------------------|---------------------------------------------------------------------------|-----------------------------------------------|---------------------------------------------------------|-----|----|
| <b>Kurtzberg et al. (2005)</b>         | Peer appraisal in pen-and-paper and online conditions                      | Actual feedback instances  | Paper vs e-mail feedback                                                  | Positive or negative valence                  | Feelings of social obligation                           | No  | No |
| <b>Lefroy et al. (2017)</b>            | Focus groups and interviews with feedback application users                | Individual survey response | Use of feedback application                                               | Rating of application's utility and usability | Comfort and familiarity with application                | Yes | No |
| <b>Lizzio et al. (2003)</b>            | Management and undergraduate survey                                        | Individual survey response | Gender                                                                    | Assessment of features of effective feedback  | None                                                    | No  | No |
| <b>Motro &amp; Ellis (2017)</b>        | Lab study assessed participants' responses to video of feedback recipients | Individual survey response | Employee reaction to negative feedback                                    | Manager appraisal of employee reaction        | Gender, crying, perceived typicality                    | No  | No |
| <b>Pampino et al. (2004)</b>           | Two-part study in a retail setting                                         | Task completion            | Task clarification, goal setting, access to rewards, and graphic feedback | Completion of routine maintenance tasks       | Feedback frequency                                      | No  | No |
| <b>Steelman &amp; Rutkowski (2004)</b> | Survey of 405 employees                                                    | Individual survey response | Feedback valence (positive or negative)                                   | Employee motivation to improve                | Source credibility, feedback quality, feedback delivery | No  | No |

## Online Appendix B

We take a log form of our dependent variable (the score rating) and rerun our model. The results are robust and are presented in Table B.1.

**Table B.1 The Impact of Rating Relationship on Feedback Scores: Log Model**

| VARIABLES               | Full Sample            |
|-------------------------|------------------------|
| Subordinate             | 0.0454***<br>[3.512]   |
| Peer                    | 0.0499***<br>[4.754]   |
| Anon                    | -0.0910***<br>[-7.532] |
| AveRecipientGotRated    | -0.00493<br>[-0.461]   |
| AveGiverRatedOthers     | -0.0249*<br>[-1.742]   |
| AveGiverGotRated        | 0.111***<br>[5.581]    |
| AveRecipientRatedOthers | 0.0503***<br>[4.563]   |
| RecipientTime           | 0.000151<br>[1.552]    |
| Organization dummies    | Yes                    |
| Group dummies           | Yes                    |
| Competency dummies      | Yes                    |
| Observations            | 4,975                  |

Robust t-statistics in brackets, \*\*\* p<0.01, \*\* p<0.05, \* p<0.1

## Online Appendix C

To help us identify the latent topics of raters’ comments, we use latent Dirichlet allocation (LDA), which is a Bayesian statistical and information retrieval technique (Blei et al. 2003; Lee et al. 2016). The input to the LDA topic model is a set of documents, which in our study is the text of raters’ comments. The output of LDA is a predefined number ( $K$ ) of topics from these posts. In addition, LDA provides a posterior topic distribution over all  $K$  topics for each post. In other words, for each comment  $m$ , the LDA model outputs a  $K$ -vector,  $\langle T_{m,1}, T_{m,2}, \dots, T_{m,K} \rangle$ , where  $T_{m,k}$  represents the weight of topic  $k$  associated with comment  $m$ . Also, for each comment  $m$  and topic  $k$ ,  $T_{m,k} \geq 0$ , and  $\sum_{k=1}^K T_{m,k} = 1$ .

We run the LDA model with  $K = 3, 5$ , and 10 topics, and find that 3 is the optimal number of latent topics in terms of the posterior log-marginal likelihood (Nam et al. 2017). A list of the most frequent words associated with each latent topic is shown in Table C.1. We can see that topics 2 and 3 are more likely to be associated with personal opinions. In contrast, topic 1 is more likely to be associated with giving specific comments. For each comment  $m$ , if the weight of topic 1 is greater than the sum of the weights of topics 2 and 3, then we say this rater receives event-based feedback. Then, we construct two dummy variables: (i) *InitialEvent<sub>j</sub>*, which indicates whether a recipient whose initial score is less than 4 and receives event-based feedback, and (ii) *InitialNotEvent<sub>j</sub>*, which indicates whether a recipient whose initial score is less than 4 and does not receive event-based feedback.

**Table C.1 Keywords Associated with Each Topic**

| Topic # | Keywords                                                                                                                                                                                                                                                  |
|---------|-----------------------------------------------------------------------------------------------------------------------------------------------------------------------------------------------------------------------------------------------------------|
| 1       | work, thanks, job, team, your, problem, improve, change, issue, help, always, appreciate, feedback, keep, helpful, our, support, make, professional, care, leader, beyond, training, hard, think, advice, continue, grow, provide, presentation, learning |
| 2       | great, very, best, really, good, much, pleasure, positive, awesome, love, well, excellent, truly, nice, wonderful, most, amazing, greatly, dedication, outstanding, happy, friendly, fantastic, like, exceptional, impressive                             |
| 3       | not, difficult, especially, stressful, negative, critical, complex, haven’t, probably, confusing, easily, less, long, harder, limited, lost, properly, lack, doesn’t, frustrated, overall, lose, snappy, hazard                                           |

We estimate the following regression equation:

$$\begin{aligned}
 Score_{ijt} = & a_i + \beta_0 + \beta_1 Subordinate_{ij} + \beta_2 Peer_{ij} + \beta_3 Anon_{ij} + \beta_4 AveRecipientGotRated_{jt} + \\
 & \beta_5 AveGiverRatedOthers_{it} + \beta_6 AveGiverGotRated_{it} + \beta_7 AveRecipientRatedOthers_{jt} + \\
 & \beta_8 RecipientTime_{jt} + \beta_9 RecipientTime_{jt} * (InitialEvent_j) + \beta_{10} RecipientTime_{jt} * \\
 & (InitialNotEvent_j) + \beta_{11} InitialEvent_j + \beta_{12} InitialNotEvent_j + controls + \varepsilon_{ijt}.
 \end{aligned}$$

**Table C.2 The Impact of Rating Relationship on Feedback Scores: Event-Based Feedback**

| VARIABLES                     | (2)<br>Full Sample     |
|-------------------------------|------------------------|
| Subordinate                   | 0.188***<br>[4.418]    |
| Peer                          | 0.204***<br>[5.732]    |
| Anon                          | -0.251***<br>[-6.217]  |
| AveRecipientGotRated          | -0.000869<br>[-0.0132] |
| AveGiverRatedOthers           | -0.0737<br>[-1.431]    |
| AveGiverGotRated              | 0.337***<br>[4.841]    |
| AveRecipientRatedOthers       | 0.153***<br>[4.322]    |
| RecipientTime                 | 0.000492<br>[1.448]    |
| RecipientTime*InitialEvent    | 0.00481**<br>[2.187]   |
| RecipientTime*InitialNotEvent | 0.00136<br>[1.625]     |
| InitialEvent                  | 0.0116**<br>[2.032]    |
| InitialNotEvent               | -0.0134<br>[-0.547]    |
| Organization dummies          | Yes                    |
| Group dummies                 | Yes                    |
| Competency dummies            | Yes                    |
| Observations                  | 4,975                  |

Robust t-statistics in brackets, \*\*\* p<0.01, \*\* p<0.05, \* p<0.1

The estimation results are presented in Table C.2. We find that the coefficient on  $RecipientTime_{jt} * (InitialEvent_j)$  is positive and significant, and the coefficient on  $RecipientTime_{jt} * (InitialNotEvent_j)$

is not significant. It suggests that (i) the scores of recipients who receive initial low scores and event-based feedback increase more significantly than those of recipients with initial high scores; and (ii) the scores of recipients who receive initial low scores and do not receive event-based feedback are not statistically different from those of recipients with initial high scores. Recall that our previous result is that scores of recipients with initial low scores increase more significantly than those of other recipients. Our analysis demonstrates that this result is mainly driven by employees who received event-based feedback rather than employees who received comments about personal opinions.
